# Supplementary material
Source: publisher figshare collection journal article supplement (https://acs.figshare.com/ndownloader/files/4228891)
Supplement: Supplementary file 1 [file 4228891]

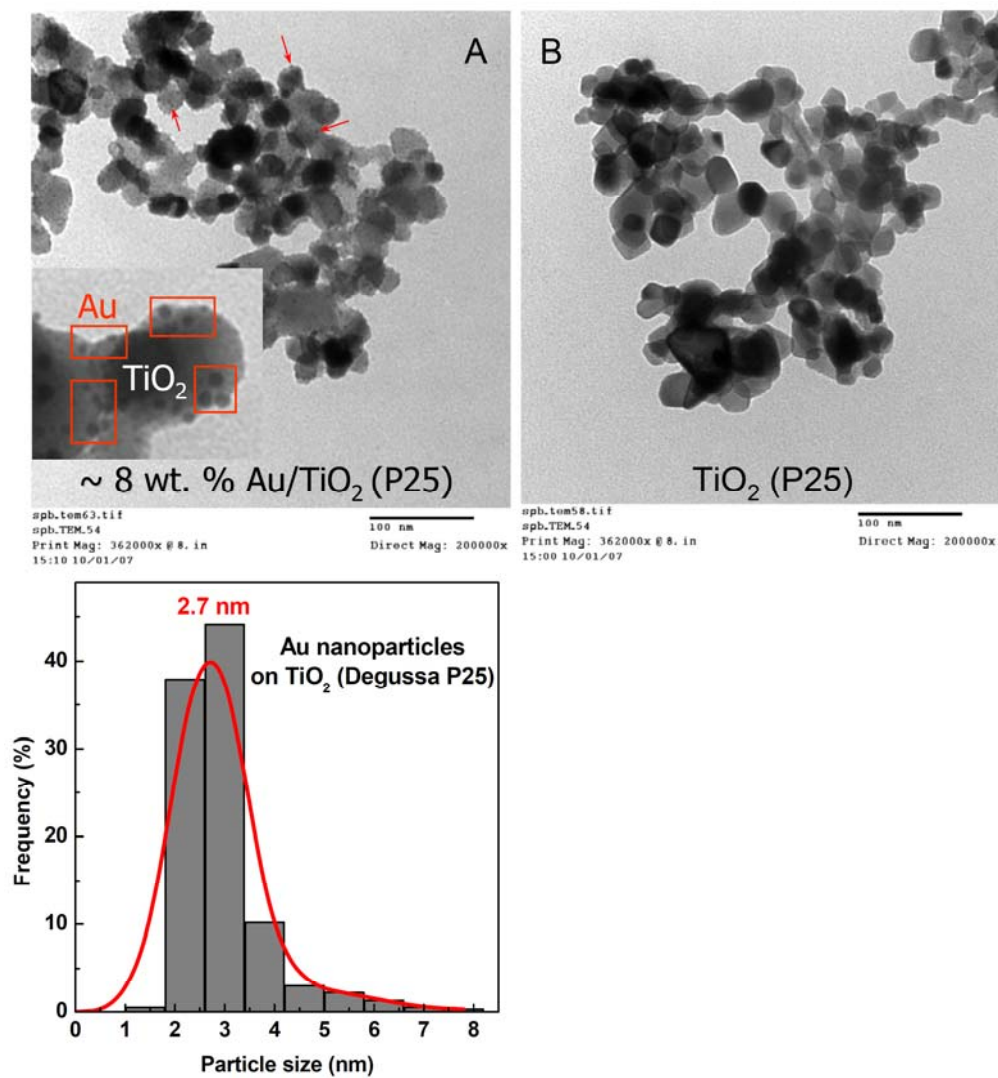

**Figure SI 1.** Transmission electron microscopy (TEM) images of (A) the 8 % w/w Au/TiO<sub>2</sub> sample and (B) the Degussa P25 TiO<sub>2</sub> sample; (C) Au particles size distribution of as prepared Au/TiO<sub>2</sub> sample made from measurement of 80 particles diameters.
